# Supplementary material
Source: PubMed Central journal article supplement (PMC9677509)
Supplement: NIHMS1002297-supplement-Figure_S1.pdf [file NIHMS1002297-supplement-Figure_S1.pdf]

# The Usher Syndrome Type IIIB Histidyl-tRNA Synthetase Mutation Confers Temperature Sensitivity

*Jamie A. Abbott<sup>1</sup>, Ethan Guth<sup>2</sup>, Cindy Kim<sup>3</sup>, Cathy Regan<sup>3</sup>, Victoria M. Siu<sup>4,5</sup>, C. Anthony Rupa<sup>3,4,5</sup>, Borries Demeler<sup>6</sup>, Christopher S. Francklyn<sup>1\*</sup>, and Susan M. Robey-Bond<sup>1\*</sup>*

<sup>1</sup>Department of Biochemistry, University of Vermont, Burlington, Vermont, 05405, USA;

<sup>2</sup>Chemistry & Biochemistry Department, Norwich University, Northfield, Vermont, 05663, USA;

Departments of <sup>3</sup>Pathology and Laboratory Medicine, <sup>4</sup>Biochemistry and <sup>5</sup>Pediatrics, Western

University, London, Ontario, Canada; <sup>6</sup>Department of Biochemistry, The University of Texas

Health Science Center at San Antonio, San Antonio, Texas, 78229, USA.
